# Supplementary material for: Quali–Quantitative Characterization of Volatile and Non-Volatile Compounds in Protium heptaphyllum (Aubl.) Marchand Resin by GC–MS Validated Method, GC–FID and HPLC–HRMS2
Source: PubMed Central journal article supplement (PMC7962098; doi:10.3390/molecules26051447), 2021-03-07
Supplement: molecules-26-01447-s001.pdf [file molecules-26-01447-s001.pdf]

**Table S1.** Unweighted Calibration curves recalculation errors.

| STD (mg/L) | 1st Calibration curve |                | 2nd Calibration curve |                | 3rd Calibration curve |                |
|------------|-----------------------|----------------|-----------------------|----------------|-----------------------|----------------|
|            | A-AMY<br>ERR %        | B-AMY<br>ERR % | A-AMY<br>ERR %        | B-AMY<br>ERR % | A-AMY<br>ERR %        | B-AMY<br>ERR % |
| 0.1        | 130.8*                | 119.38*        | 153.03*               | 130.44*        | 25.21                 | 49.46*         |
| 0.2        | 47.79*                | 46.67*         | 63.76*                | 60.83*         | -33.94*               | 29.80*         |
| 0.5        | -13.62                | -13.00         | 4.66                  | 19.10          | -14.95                | -8.38          |
| 1          | 7.37                  | 10.93          | -18.46*               | -18.97*        | 9.20                  | 1.90           |
| 2          | -1.89                 | -1.92          | 7.51                  | -5.30          | 5.15                  | 6.26           |
| 6          | -11.82                | -14.39         | 0.10                  | -3.19          | 1.23                  | -5.63          |
| 8          | 5.63                  | 6.23           | 1.53                  | -2.77          | 8.36                  | 3.94           |
| 10         | -0.04                 | -0.22          | 1.27                  | 2.98           | -5.81                 | -0.94          |

\* excluded point.

**Table 2.** Weighted Calibration curves recalculation errors.

| STD (mg/L) | 1st Calibration curve |                | 2nd Calibration curve |                | 3rd Calibration curve |                |
|------------|-----------------------|----------------|-----------------------|----------------|-----------------------|----------------|
|            | A-AMY<br>ERR %        | B-AMY<br>ERR % | A-AMY<br>ERR %        | B-AMY<br>ERR % | A-AMY<br>ERR %        | B-AMY<br>ERR % |
| 0.1        | 18.3                  | 12.4           | 25.6                  | 18.4           | 24.6                  | -15.9          |
| 0.2        | -5.7                  | -3.5           | -12.7                 | -1.0           | -12.5                 | 5.1            |
| 0.5        | -20.0*                | -25.4 *        | -17.0*                | -7.9           | -13.7                 | 16.9*          |
| 1          | -5.7                  | -2.2           | -27.8*                | -25.7 *        | -3.2                  | -3.8           |
| 2          | -12.6                 | -11.2          | -10.5                 | -9.3           | 5.3                   | -0.3           |
| 6          | -19.5*                | -19.6*         | 2.6                   | -1.4           | 2.3                   | 0.2            |
| 8          | 6.9                   | 6.2            | -0.4                  | -1.4           | 5.9                   | 3.1            |
| 10         | -1.6                  | -1.9           | 2.1                   | 4.6            | -5.2                  | -2.6%          |

\* excluded point.

## Calculating validation parameters

For a general

$$DIFF\% = \left| \frac{m_i - \bar{m}}{\bar{m}} \right| \times 100$$

Where:

$m_i$  is the  $i$ th calibration line's slope

$\bar{m}$  is the average slope value.

$$LOD = \frac{3\sigma}{m} \quad LOQ = \frac{10\sigma}{m}$$

Where:

$m$  is calibration line's slope

$\sigma$  is data's standard deviation obtained by line equation, more precisely

$$\sigma = \sqrt{\frac{\sum_{i=1}^n (y-y')^2}{n-2}}$$

$$SEL\% = \left| \frac{\text{Peak area in blank sample}}{3 \text{ peak areas at LOQ}} \right| \times 100$$

$$E_r\% = \left| \frac{\text{Theoretical analyte concentration} - \text{True analyte concentration}}{\text{True analyte concentration}} \right| \times 100$$

$E_r\%$  is obtained for LOQ concentrations

$$RSD\% = \frac{\sigma \times 100}{\text{Peaks area average at LOQ in three spiked samples}}$$

Final parameter kept in consideration was recovery; as calculated by internal STD (17- $\alpha$ -methyltestosterone) signal in a STD solution and matrix.

$$REC(\%) = \left[ \frac{S1}{S2} \right] \times 100$$

Where:

S1 is internal standard signal in matrix

S2 is internal standard signal in standard solution

Figure S1. Formulas for validation parameters.

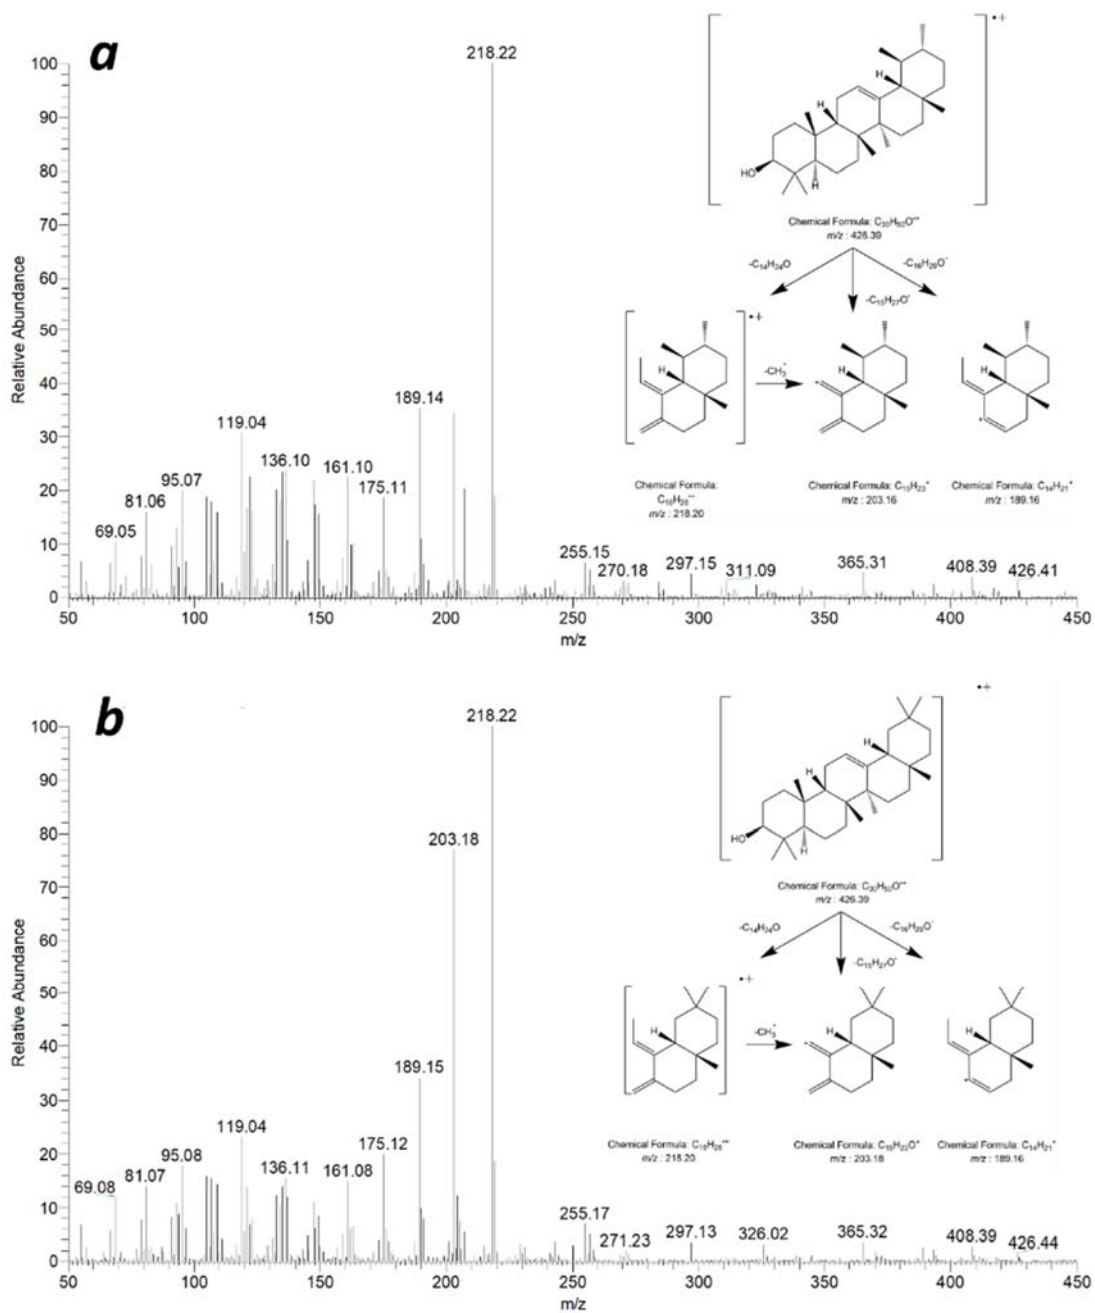

**Figure S2.** EI-MS signals and proposed fragmentation patterns for (a)  $\alpha$ -amyrin and (b)  $\beta$ -amyrin in samples, molecular ion: 426.44  $m/z$ .

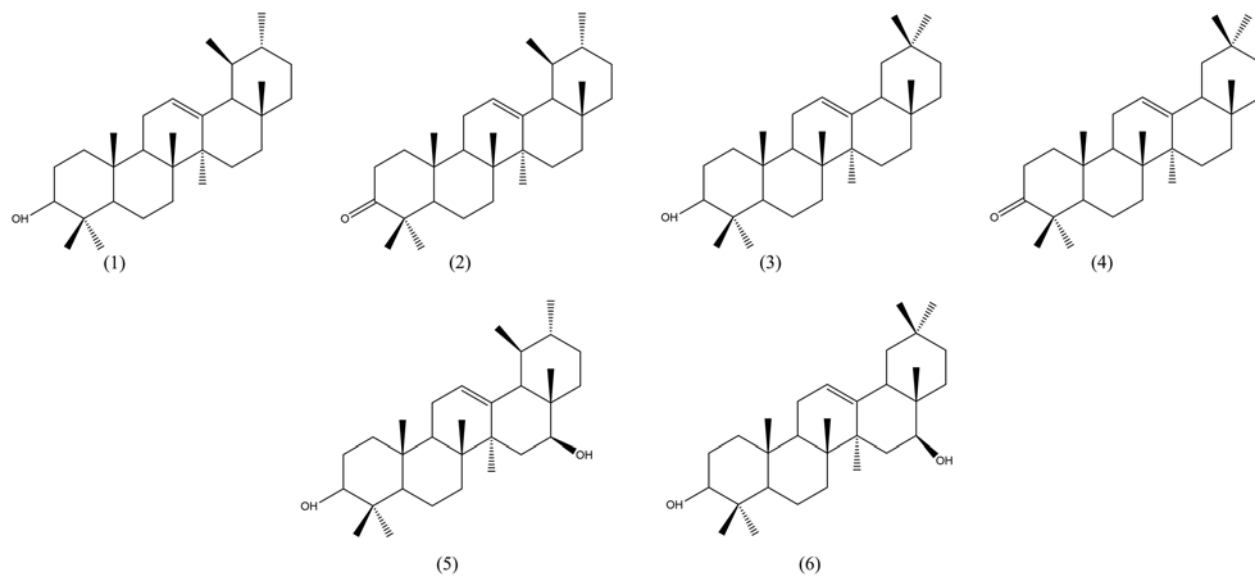

**Figure S3.** Molecular structures of main identified not acidic triterpenes in PHR, ATCE and AMCE: (1)  $\alpha$ -amyrin; (2)  $\alpha$ -amyron; (3)  $\beta$ -amyrin; (4)  $\beta$ -amyron; (5) Brein; (6) Maniladiol
